# Supplementary material for: Self-assembled chitosan/rose bengal derivative nanoparticles for targeted sonodynamic therapy: preparation and tumor accumulation
Source: Royal Society of Chemistry journal article supplement (doi:10.1039/c4ra15347b), 2015-01-01
Supplement: c4ra15347b1.pdf [file c4ra15347b1.pdf]

## Supplementary Data

### **Self-assembled chitosan/rose bengal derivative nanoparticles for targeted sonodynamic therapy: preparation and tumor accumulation**

Yu Gao<sup>1,\*</sup>, Zhihong Li<sup>1</sup>, Chaoqun Wang<sup>1</sup>, Jiali You<sup>1</sup>, Biyu Jin<sup>1</sup>, Fan Mo<sup>1</sup>, Jianzhong  
Chen<sup>2</sup>, Yunquan Zheng<sup>1</sup>, Haijun Chen<sup>1,\*</sup>

<sup>1</sup>College of Chemistry, Fuzhou University, Fuzhou 350108, China

<sup>2</sup>School of Pharmacy, Fujian University of Traditional Chinese Medicine, Fuzhou  
350108, China

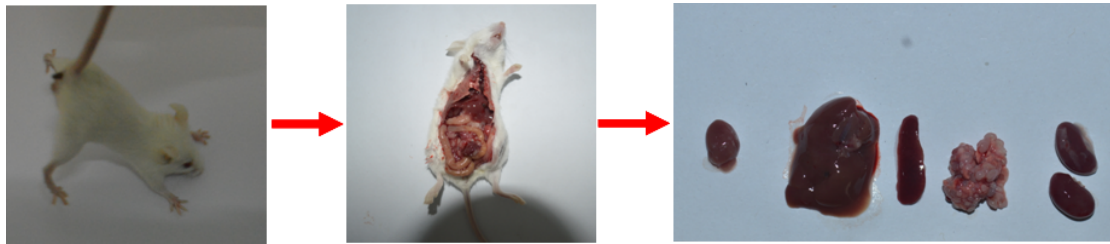

**Figure S1.** Photographs of the body and the organs of the representative mouse.
